# Supplementary material
Source: Research Square preprint supplement (doi:10.21203/rs.3.rs-9424896/v1)
Supplement: Supplementary file 1 [file 594e8a7c0e244b7e494c846d.docx]

**Table 1: Effect of *Chloris barbata and Phyllanthus niruri* extracts on the physico-chemical characteristics of rhizosphere of *Vigna ungiculata* (L.) Walp. and *Lablab purpures* (L.) Sweet**

| **Samples** | **pH** | **EC**  **(mmhos**  **/cm)** | **Organic carbon**  **(%)** | **Available nitrogen**  **(Kg/ha)** | **Phosphorus**  **(Kg/ha)** | **Potash**  **(Kg/ha)** | **Sulphur**  **(PPM)** | **Moisture**  **(%)** | **Water**  **Holding capacity**  **(ml)** |
| --- | --- | --- | --- | --- | --- | --- | --- | --- | --- |
| **TB** | 8.17 | 5.84 | 0.03% | 141.12 | 9.66 | 161.28 | 18.24 | 85.605 | 18.504 |
| **TCC** | 8.12 | 0.69 | 0.03% | 147.39 | 9.66 | 174.72 | 19.16 | 84.423 | 19.672 |
| **TIC** | 7.74 | 0.62 | 0.04% | 153.66 | 11.04 | 174.72 | 19.61 | 86.028 | 19.69 |
| **T1** | 7.69 | 0.59 | 0.06% | 163.07 | 12.42 | 188.16 | 23.72 | 87.004 | 19.955 |
| **T2** | 7.67 | 0.46 | 0.09% | 169.34 | 13.8 | 188.16 | 25.94 | 88.915 | 20.041 |
| **T3** | 7.64 | 0.37 | 0.12% | 178.75 | 20.7 | 188.16 | 30.56 | 90.428 | 20.224 |
| **T4** | 7.59 | 0.35 | 0.21% | 181.89 | 28.98 | 201.6 | 40.59 | 90.461 | 20.301 |
| **T5** | 7.4 | 0.35 | 0.21% | 203.84 | 38.64 | 201.6 | 42.88 | 91.195 | 20.36 |
| **T6** | 7.37 | 0.34 | 0.06% | 216.38 | 44.16 | 215.04 | 46.98 | 91.245 | 20.586 |
| **T7** | 7.31 | 0.3 | 0.39% | 232.06 | 52.44 | 241.92 | 48.35 | 94.035 | 20.588 |
| **T8** | 7.43 | 0.26 | 0.42% | 254.02 | 63.48 | 336 | 535.03 | 96.07 | 20.613 |
| **T9** | 7.64 | 0.46 | 0.09% | 163.07 | 23.46 | 174.72 | 23.91 | 86.883 | 19.888 |
| **T10** | 7.64 | 0.46 | 0.20% | 166.21 | 27.6 | 188.16 | 29.19 | 87.203 | 19.935 |
| **T11** | 7.6 | 0.45 | 0.26% | 181.89 | 35.88 | 201.6 | 38.31 | 88.766 | 20.21 |
| **T12** | 7.6 | 0.41 | 0.27% | 185.02 | 38.64 | 201.6 | 42.88 | 89.227 | 20.258 |
| **T13** | 7.41 | 0.39 | 0.28% | 194.43 | 41.4 | 215.04 | 44.7 | 90.235 | 20.398 |
| **T14** | 7.32 | 0.35 | 0.30% | 197.57 | 42.78 | 228.48 | 45.16 | 90.972 | 20.431 |
| **T15** | 7.26 | 0.33 | 0.34% | 197.57 | 46.92 | 241.92 | 60.21 | 94.163 | 20.453 |
| **T16** | 7.22 | 0.29 | 0.34% | 244.61 | 48.3 | 255.36 | 382.23 | 94.2 | 20.592 |
| **CV (%)** | 0.87 | 1.74 | 1.03 | 0.88 | 0.97 | 0.88 | 1.68 | 0.87 | 0.87 |
| **CD (1%)** | 0.1452 | 0.0269 | 0.0045 | 3.6526 | 0.6859 | 4.0831 | 2.9705 | 1.7237 | 0.3863 |
| **CD (5%)** | 0.1084 | 0.0201 | 0.0033 | 2.727 | 0.5121 | 3.0483 | 2.2177 | 1.2869 | 0.2884 |

(Note: p-value < 0.001 indicates the result is statistically highly significant)

**Note:** **TB** – Before treated soil, **TCC**- *Vigna ungiculata* control, **TIC**- *Lablab purpures* L. control, **T1**- *Vigna ungiculata* 25% *Chloris barbata* extract treated, **T2-** *Vigna ungiculata* 50% *Chloris barbata* extract treated, **T3**- *Vigna ungiculata* 75% *Chloris barbata* extract treated,**T4**- *Vigna ungiculata* 100% *Chloris barbata* extract treated, **T5**- *Vigna ungiculata* 25% *Phyllanthus niruri* extract treated,**T6** - *Vigna ungiculata* 50% *Phyllanthus niruri* extract treated , **T7**- *Vigna ungiculata* 75% *Phyllanthus niruri* extract treated, **T8** - *Vigna ungiculata* 100% *Phyllanthus niruri* extract treated, **T9**- *Lablab purpures* L. 25% *Chloris barbata* extract treated,**T10**- *Lablab purpures* L. 50% *Chloris barbata* extract treated, **T11**- *Lablab purpures* L. *7*5% *Chloris barbata* extract treated,**T12**- *Lablab purpures* L. 100% *Chloris barbata* extract treated, **T13**- *Lablab purpures* L. 25% *Phyllanthus niruri* extract treated, **T14**- *Lablab purpures* L. 50% *Phyllanthus niruri* extract treated, **T15**- *Lablab purpures* L. 75% *Phyllanthus niruri* extract treated, **T16**- *Lablab purpures* L. 100% *Phyllanthus niruri* extract treated.

**Table 2: Effect of *Chloris barbata and Phyllanthus niruri* extracts on the physico-chemical characteristics of rhizosphere soil texture of *Vigna ungiculata* (L.) Walp. and *Lablab purpures* (L.) Sweet**

| **Soil Samples** | **Gravel (%)** | **Very coarse sand (%)** | **Coarse sand (%)** | **Medium sand (%)** | **Fine sand (%)** | **Measured**  **Sand (%)** | **Dominant sand type** |
| --- | --- | --- | --- | --- | --- | --- | --- |
| **TB** | 66.349 | 32.131 | 1.291 | 0.202 | 0.094 | 33.718 | Very coarse sand |
| **TCC** | 63.425 | 33.26 | 2.686 | 0.311 | 0.117 | 36.374 | Very coarse sand |
| **TIC** | 78.507 | 20.131 | 1.336 | 0.221 | 0.15 | 21.839 | Very coarse sand |
| **T1** | 65.041 | 31.202 | 3.614 | 0.415 | 0.187 | 35.417 | Very coarse sand |
| **T2** | 78.138 | 11.466 | 8.161 | 1.026 | 0.485 | 21.138 | Very coarse sand |
| **T3** | 77.589 | 8.91 | 6.057 | 2.941 | 4.069 | 21.977 | Very coarse sand |
| **T4** | 66.129 | 7.939 | 13.702 | 6.383 | 5.701 | 33.725 | Coarse sand |
| **T5** | 66.454 | 25.498 | 6.93 | 0.846 | 0.239 | 33.513 | Very coarse sand |
| **T6** | 63.656 | 14.722 | 15.947 | 2.638 | 2.677 | 35.984 | Coarse sand |
| **T7** | 65.206 | 13.761 | 11.677 | 3.847 | 4.937 | 34.222 | Very coarse sand |
| **T8** | 60.112 | 8.891 | 18.506 | 6.957 | 5.682 | 40.037 | Coarse sand |
| **T9** | 71.455 | 24.133 | 3.662 | 0.648 | 0.166 | 28.608 | Very coarse sand |
| **T10** | 84.99 | 10.146 | 4.164 | 0.563 | 0.312 | 15.185 | Very coarse sand |
| **T11** | 58.831 | 16.532 | 16.001 | 5.234 | 2.678 | 40.444 | Very coarse sand |
| **T12** | 65.693 | 12.888 | 12.267 | 3.725 | 5.318 | 34.198 | Very coarse sand |
| **T13** | 74.08 | 21.339 | 3.591 | 0.587 | 0.223 | 25.741 | Very coarse sand |
| **T14** | 65.9 | 11.255 | 14.585 | 5.423 | 2.207 | 33.469 | Coarse sand |
| **T15** | 65.145 | 11.888 | 14.489 | 4.426 | 3.309 | 34.112 | Coarse sand |
| **T16** | 61.259 | 11.189 | 15.083 | 6.228 | 5.927 | 38.428 | Coarse sand |
| **CV (%)** | 0.35 | 0.38 | 0.41 | 0.46 | 0.48 | 0.35 | - |
| **CD (1%)** | 0.527 | 0.146 | 0.082 | 0.028 | 0.025 | 0.247 | - |
| **CD (5%)** | 0.393 | 0.109 | 0.062 | 0.021 | 0.019 | 0.185 | - |

(Not: p-value < 0.001 indicates the result is statistically highly significant)

**Note:** **TB** – Before treated soil, **TCC**- *Vigna ungiculata* control, **TIC**- *Lablab purpures* L. control, **T1**- *Vigna ungiculata* 25% *Chloris barbata* extract treated, **T2-** *Vigna ungiculata* 50% *Chloris barbata* extract treated, **T3**- *Vigna ungiculata* 75% *Chloris barbata* extract treated,**T4**- *Vigna ungiculata* 100% *Chloris barbata* extract treated, **T5**- *Vigna ungiculata* 25% *Phyllanthus niruri* extract treated,**T6** - *Vigna ungiculata* 50% *Phyllanthus niruri* extract treated , **T7**- *Vigna ungiculata* 75% *Phyllanthus niruri* extract treated, **T8** - *Vigna ungiculata* 100% *Phyllanthus niruri* extract treated, **T9**- *Lablab purpures* L. 25% *Chloris barbata* extract treated,**T10**- *Lablab purpures* L. 50% *Chloris barbata* extract treated, **T11**- *Lablab purpures* L. *7*5% *Chloris barbata* extract treated,**T12**- *Lablab purpures* L. 100% *Chloris barbata* extract treated, **T13**- *Lablab purpures* L. 25% *Phyllanthus niruri* extract treated, **T14**- *Lablab purpures* L. 50% *Phyllanthus niruri* extract treated, **T15**- *Lablab purpures* L. 75% *Phyllanthus niruri* extract treated, **T16**- *Lablab purpures* L. 100% *Phyllanthus niruri* extract treated.
